# Supplementary material
Source: PubMed Central journal article supplement (PMC10945659)

Figure 1D

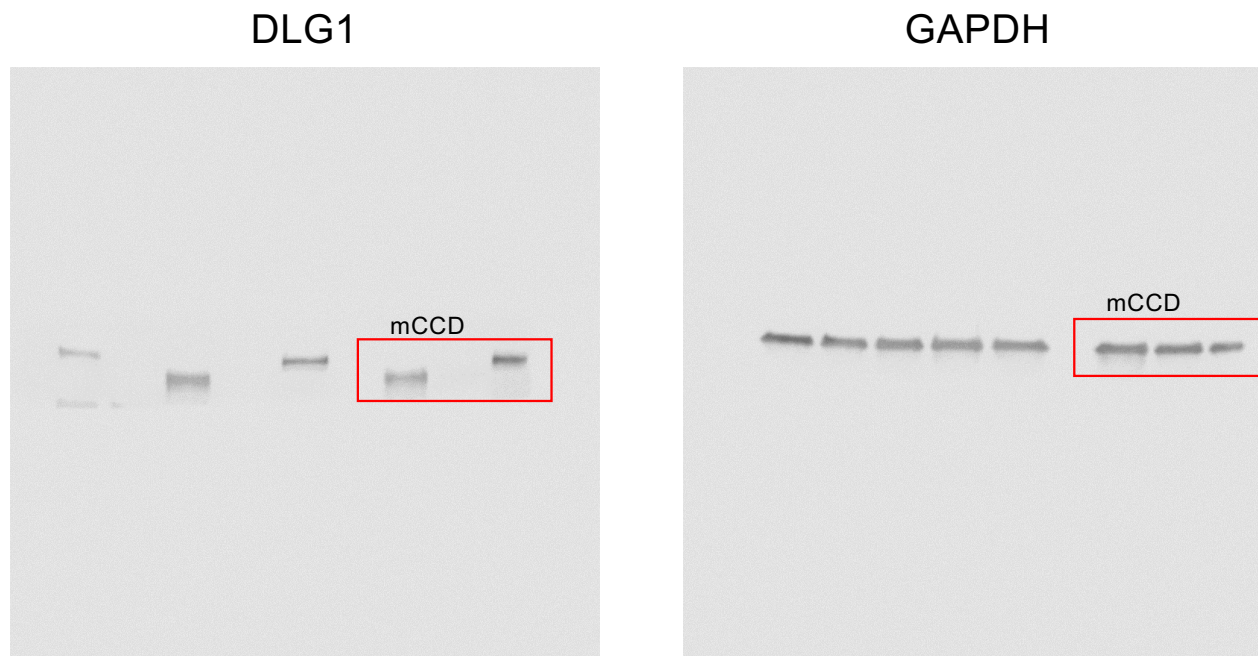

Figure 3C

DLG1

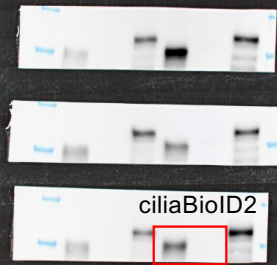

GAPDH

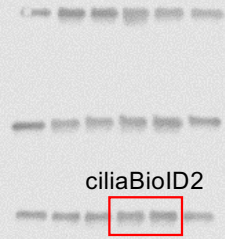

SDCCAG3

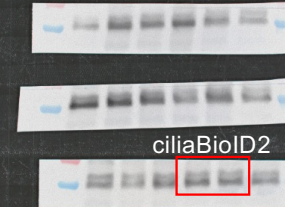

IFT20

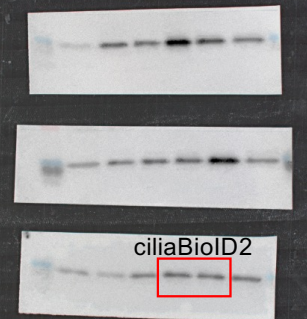

Figure 3D

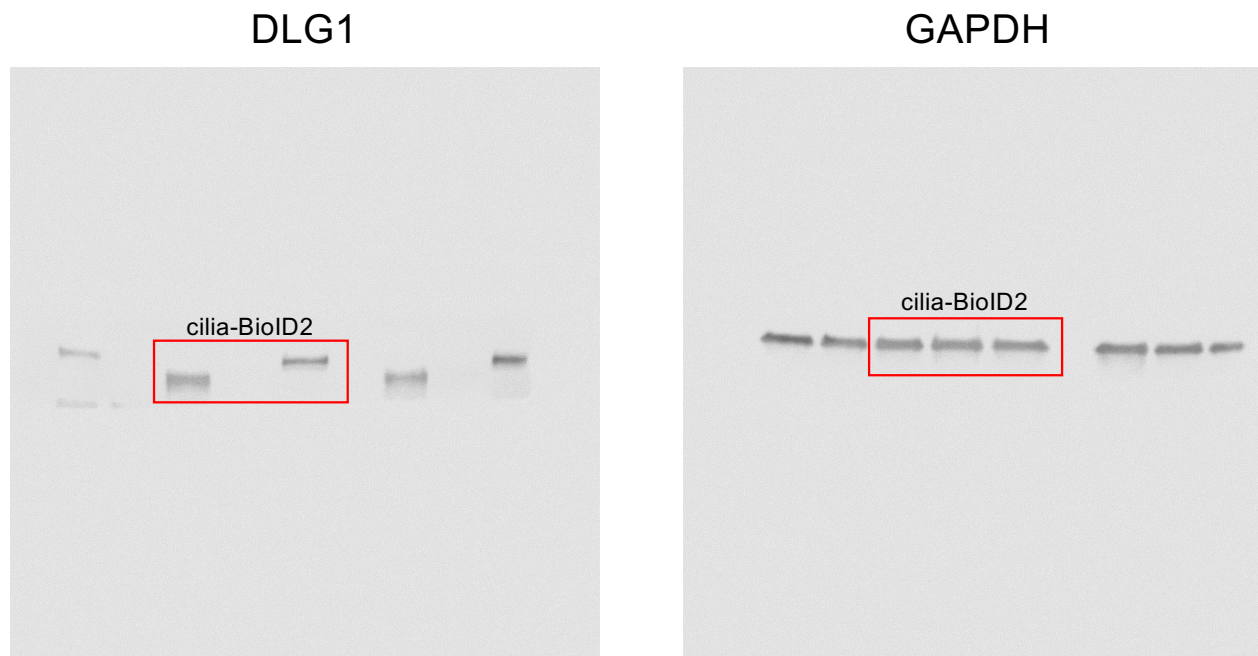

Figure 3G

DLG1

GAPDH

SDCCAG3

IFT20

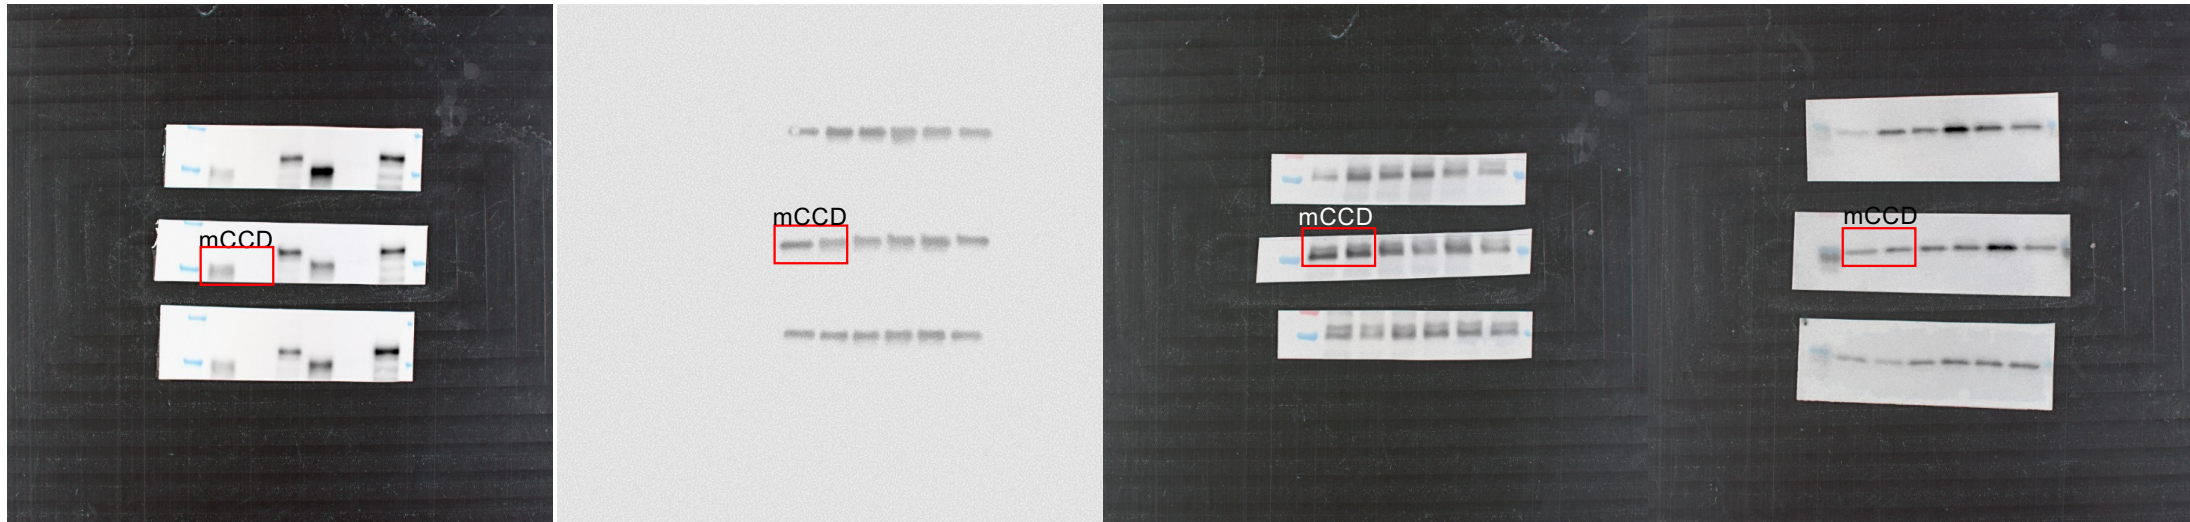

Figure 6B

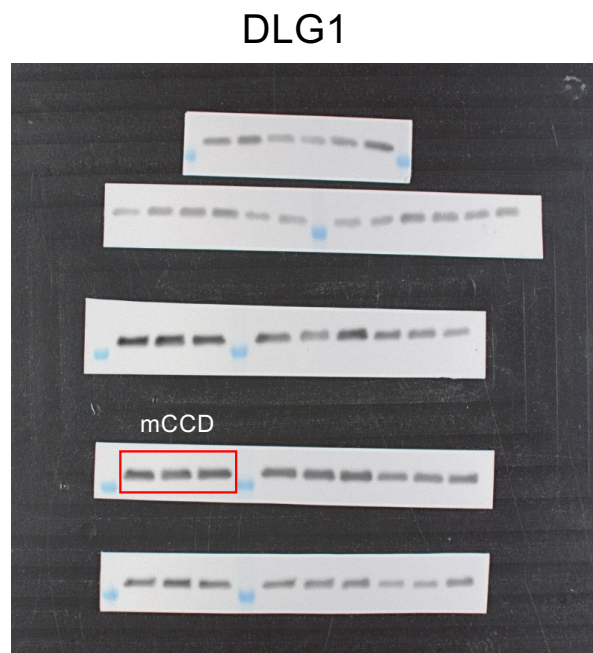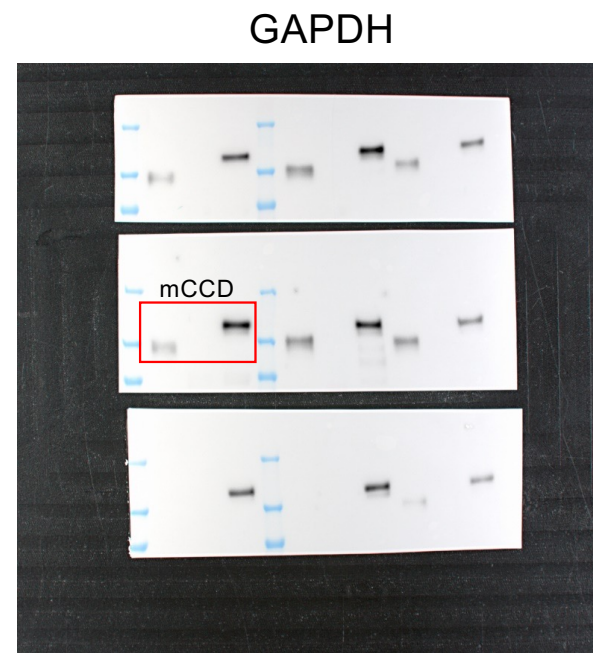

Figure 6G

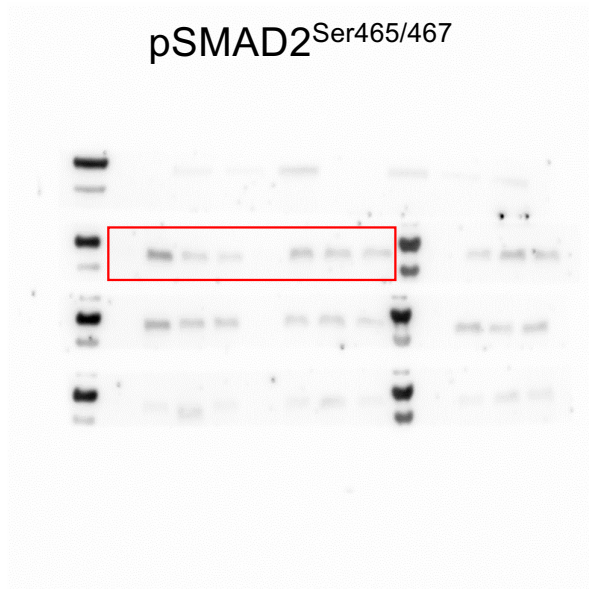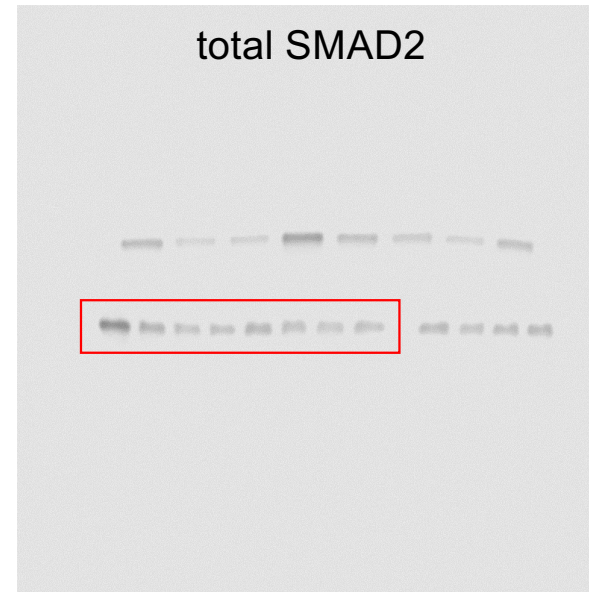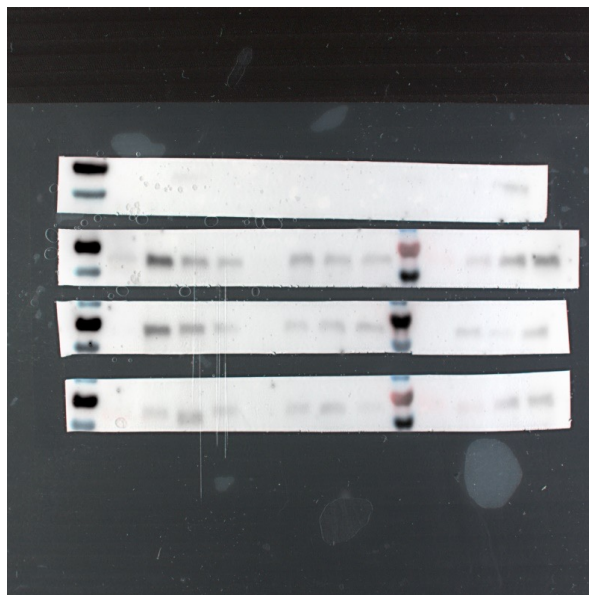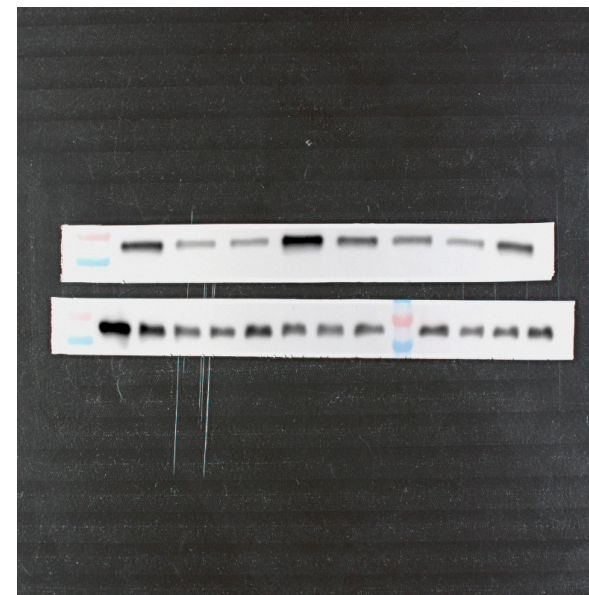

Figure 6I

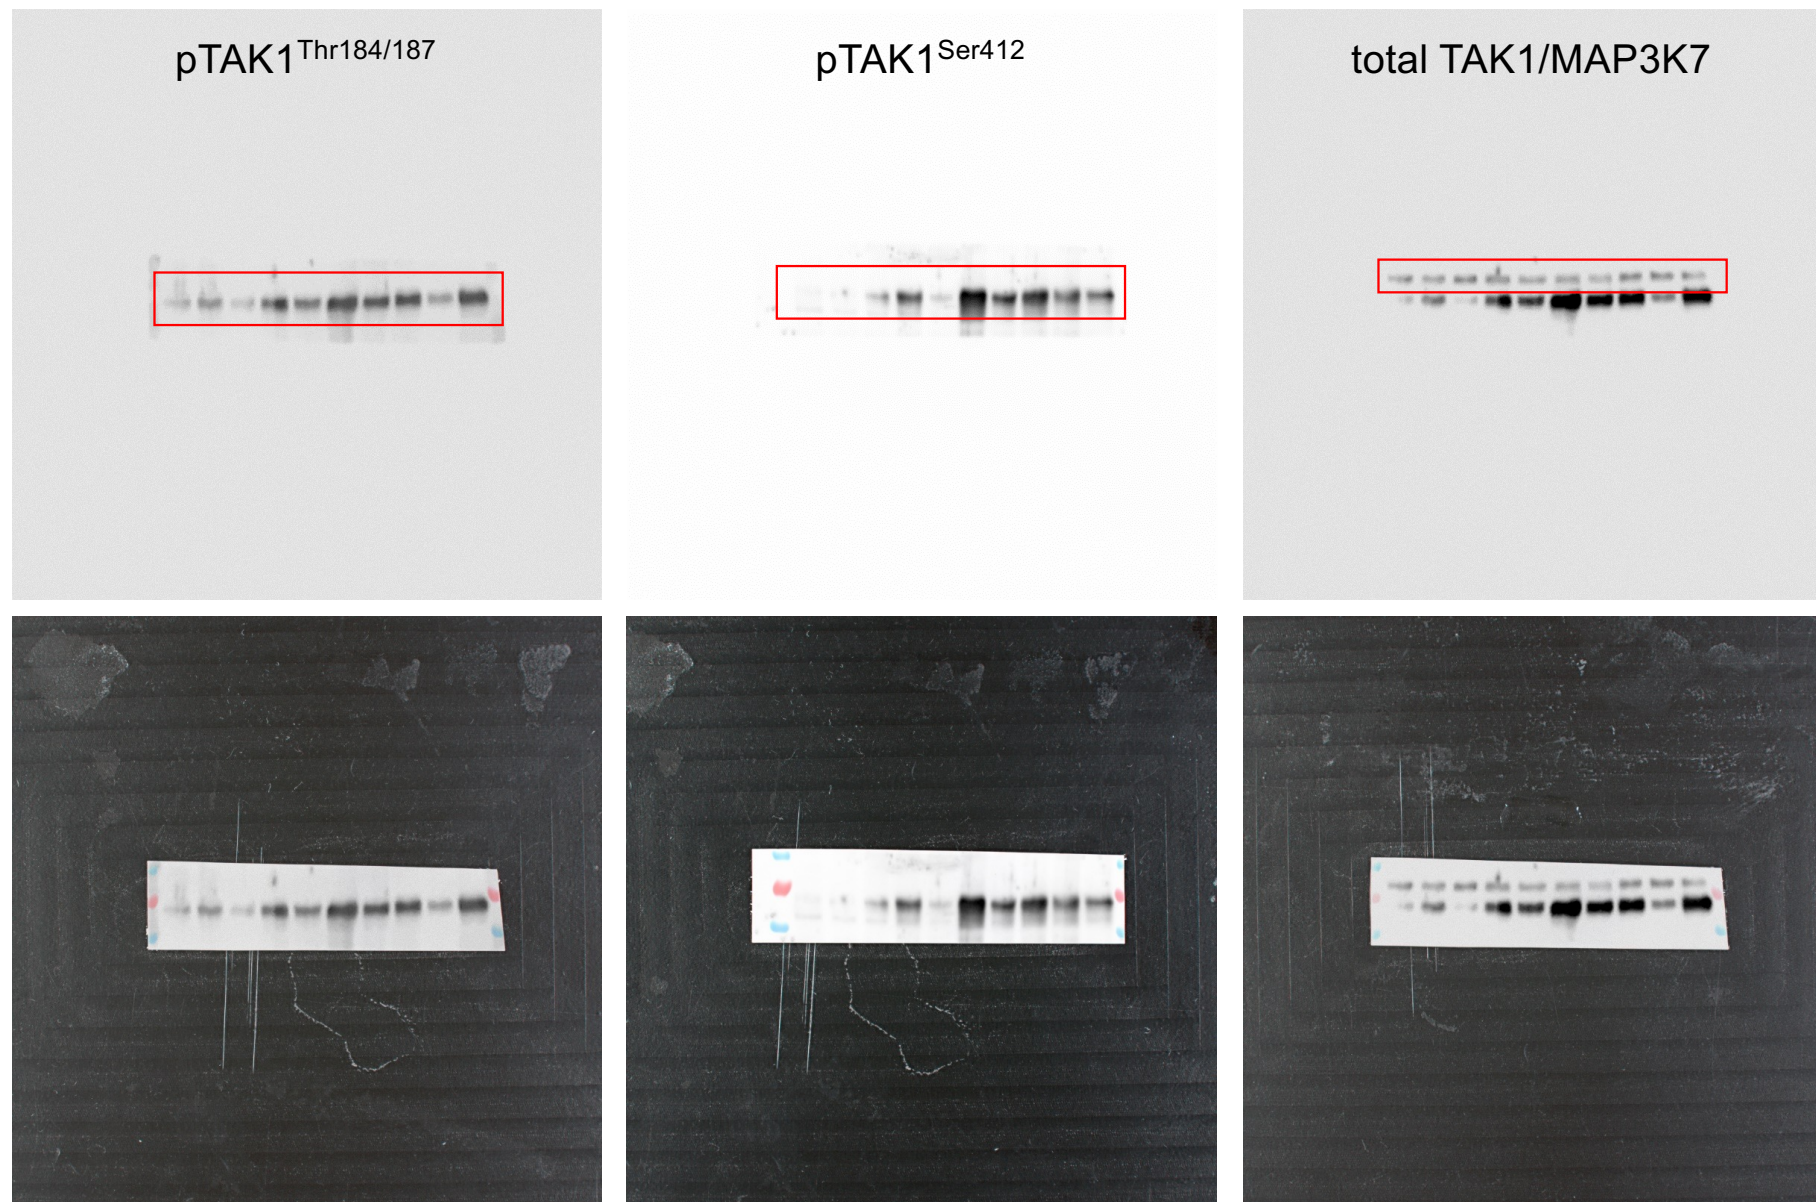

Figure 7A

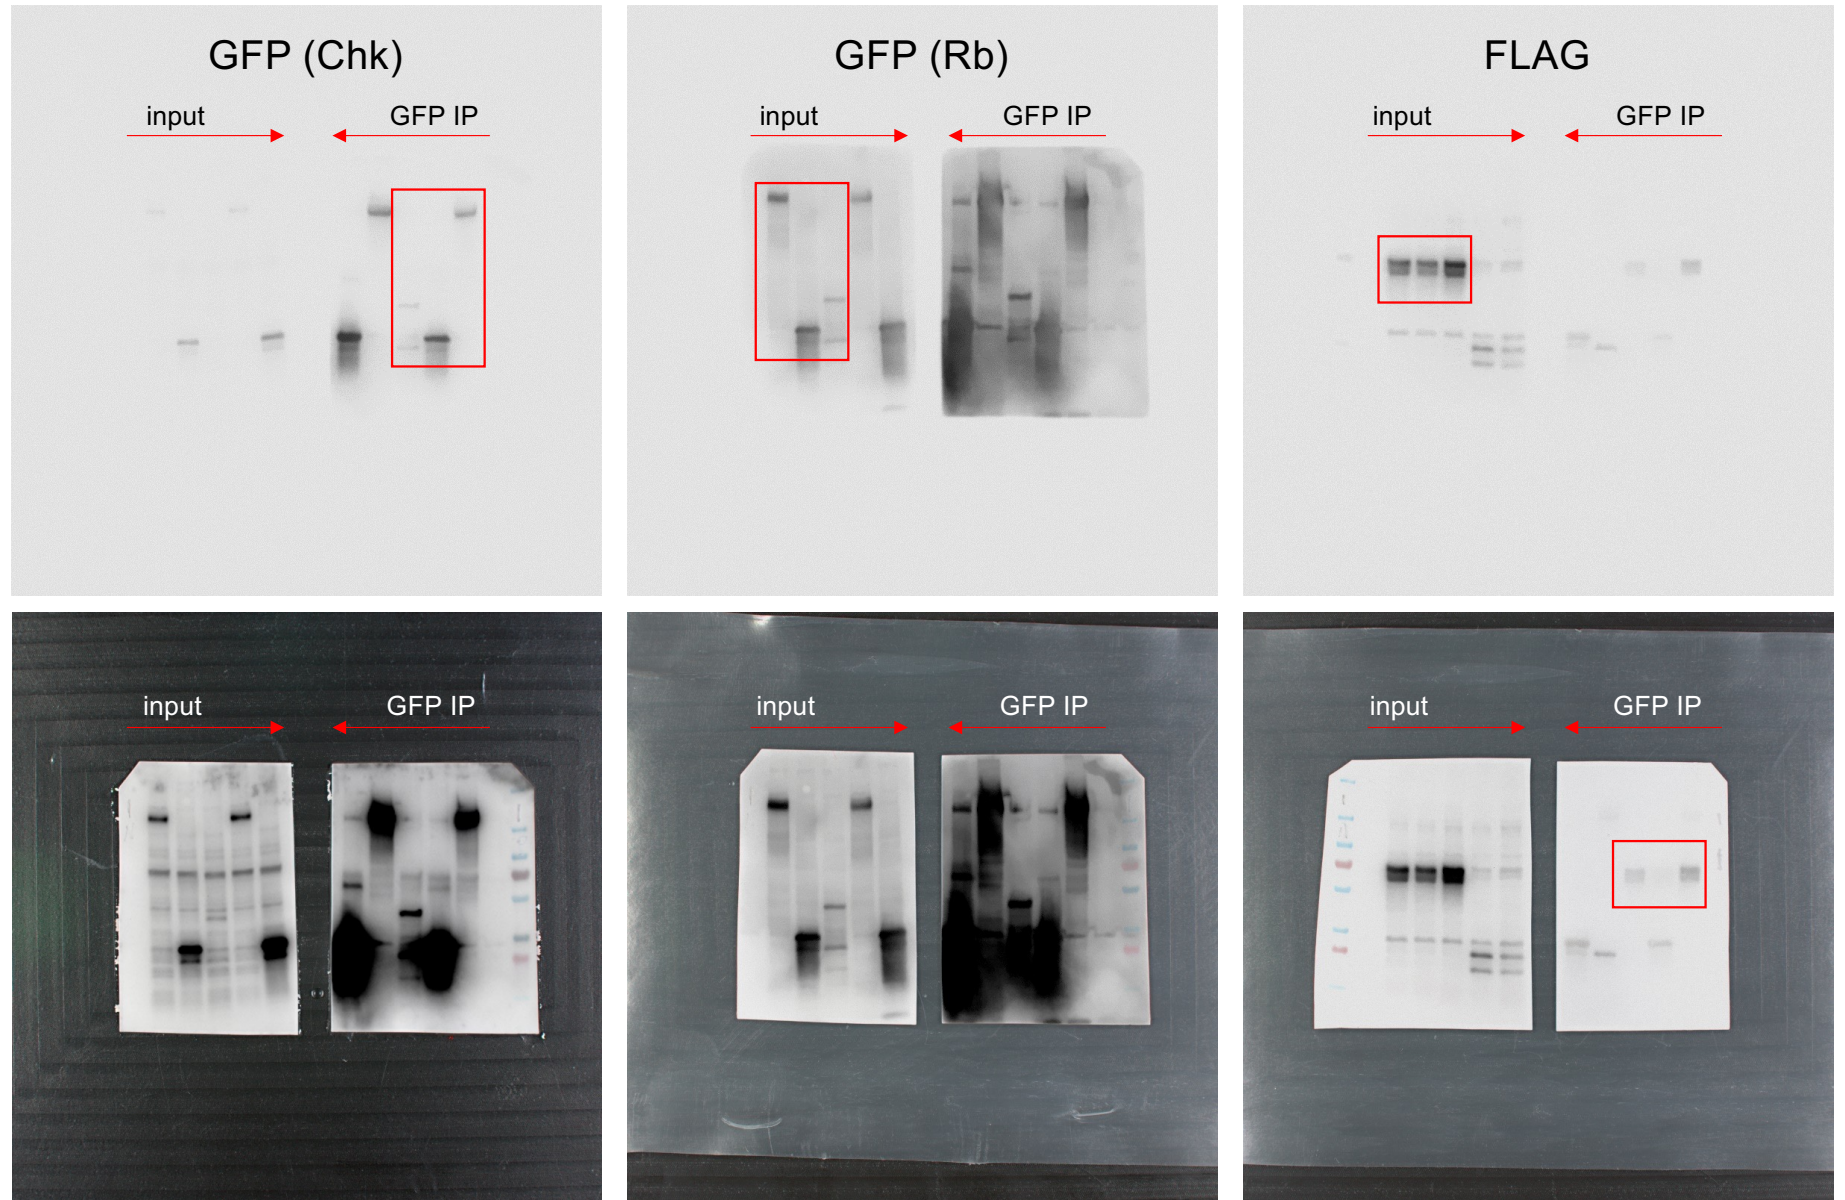



Figure 7B

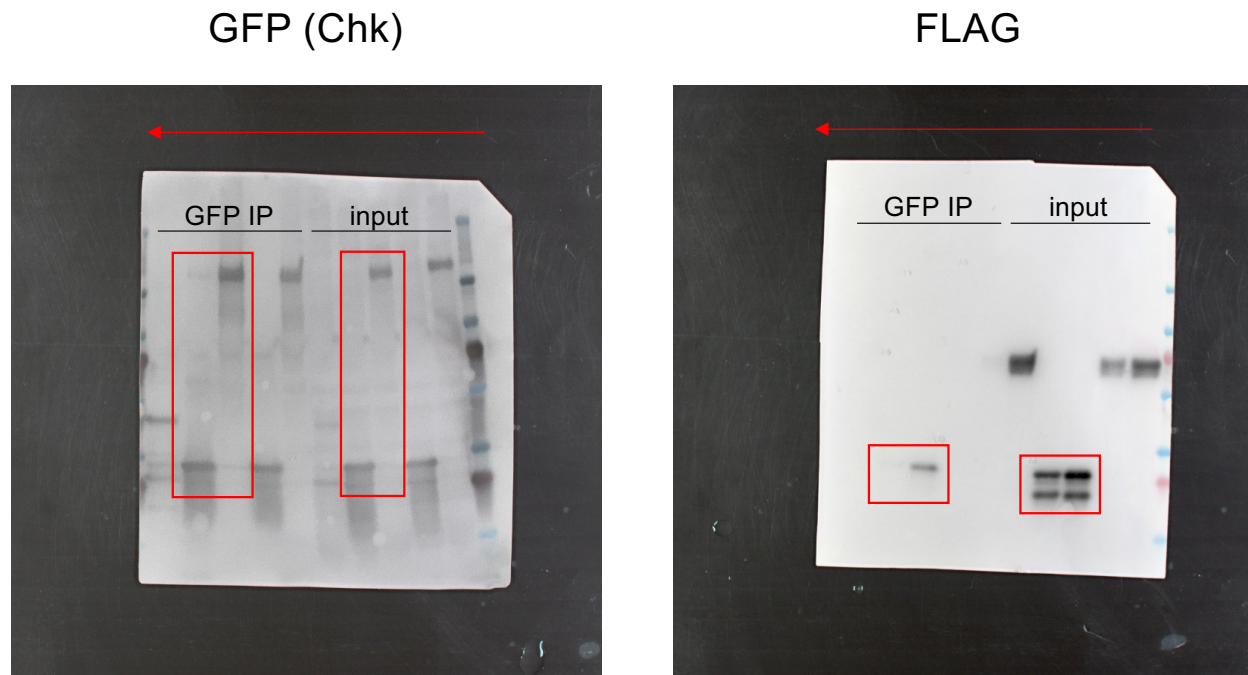

Supplemental Figure 2A

DLG1

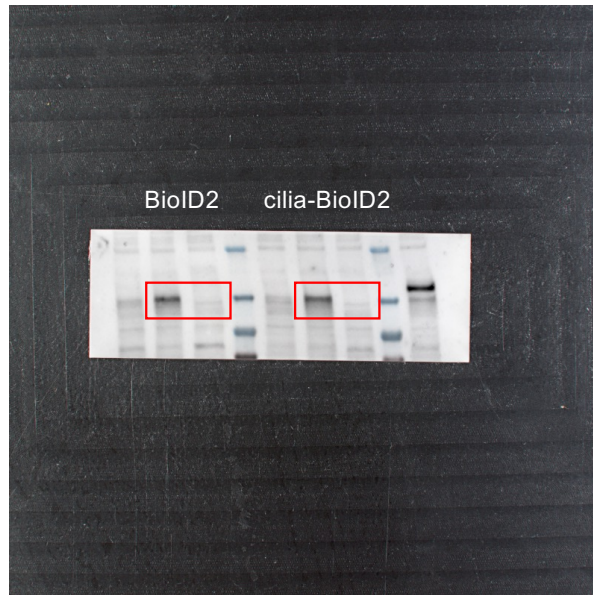

GAPDH

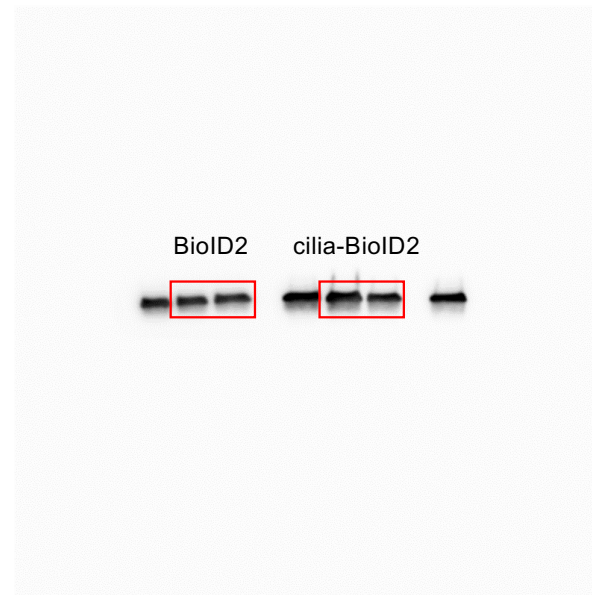

Supplemental Figure 4B and 4E

DLG1

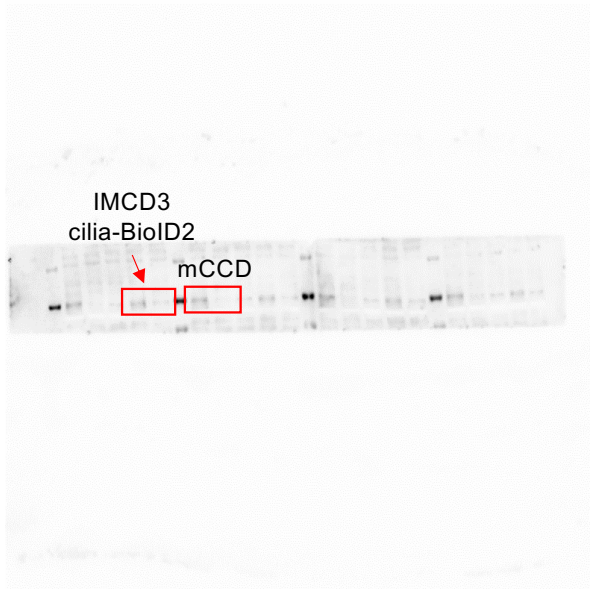

SEC8

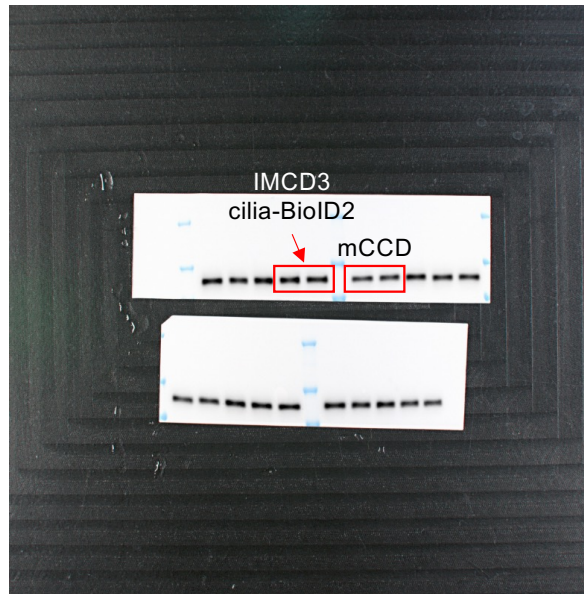

GAPDH

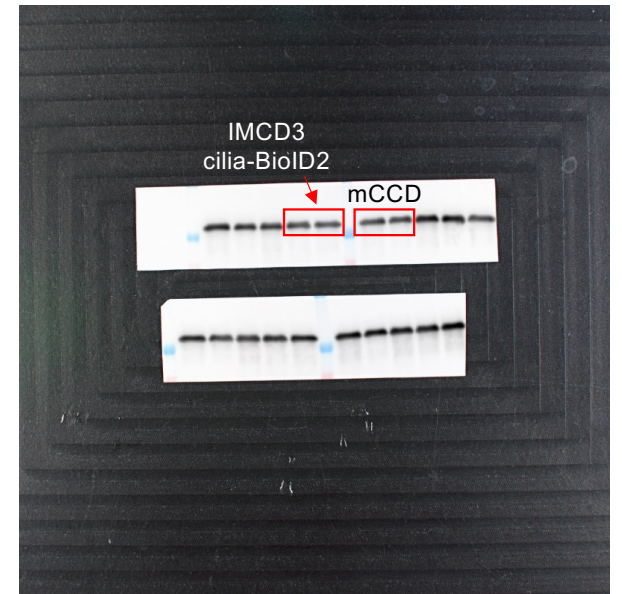

Supplement: media-3.pdf [file media-3.pdf]
